# Supplementary material
Source: PubMed Central journal article supplement (PMC5415067)
Supplement: CPH701770_ONLINE_APPENDIX.pdf [file CPH701770_ONLINE_APPENDIX.pdf]

# Use of potentially inappropriate medications among ambulatory home-dwelling elderly patients with dementia: A review of the literature

*Tejal Patel, BScPharm, PharmD; Karen Slonim, MA, PhD; Linda Lee, MD, MCISC (FM), CCFP (COE), FCFP*

**APPENDIX 1** Comparison of some drugs and classes of drugs identified as potentially inappropriate by different tools

| PIM criteria                                        | Drugs                        | 2003 Beers criteria  | Laroche List | Lindblad classification <sup>†</sup> | PRISCUS list |
|-----------------------------------------------------|------------------------------|----------------------|--------------|--------------------------------------|--------------|
| <b>Analgesics</b>                                   |                              |                      |              |                                      |              |
| Nonsteroidal anti-inflammatory drugs <sup>‡</sup>   | Acemetacin                   |                      |              |                                      | *            |
|                                                     | Aspirin                      | *                    |              | *                                    |              |
|                                                     | Diflunisal                   | *                    |              |                                      |              |
|                                                     | Etodolac                     | *                    |              |                                      |              |
|                                                     | Etoricoxib                   |                      |              |                                      | *            |
|                                                     | Indomethacin                 | *                    | *            |                                      | *            |
|                                                     | Ketoprofen                   | *                    |              |                                      | *            |
|                                                     | Ketorolac, includes parental | *                    |              |                                      |              |
|                                                     | Meloxicam                    | *                    |              |                                      | *            |
|                                                     | Naproxen                     | *                    |              |                                      |              |
|                                                     | Oxaprozin                    | *                    |              |                                      |              |
|                                                     | Phenylbutazone               |                      |              | *                                    | *            |
|                                                     | Piroxicam                    | *                    |              |                                      | *            |
|                                                     | Opioid analgesics            | Meperidine/pethidine | *            |                                      |              |
| Pentazocine                                         |                              | *                    |              |                                      |              |
| Tramadol                                            |                              |                      |              | *                                    |              |
| <b>Antiarrhythmic drugs</b>                         |                              |                      |              |                                      |              |
|                                                     | Acetyldigoxin                |                      |              |                                      | *            |
|                                                     | Amiodarone                   | *                    |              |                                      |              |
|                                                     | Digoxin                      | *                    | *            |                                      | *            |
|                                                     | Disopyramide                 | *                    | *            | *                                    |              |
|                                                     | Flecainide                   |                      |              |                                      | *            |
|                                                     | Metildigoxin                 |                      |              |                                      | *            |
|                                                     | Procainamide                 |                      |              | *                                    |              |
|                                                     | Quinidine                    |                      |              | *                                    | *            |
|                                                     | Sotalol                      |                      |              |                                      | *            |
| <b>Antibiotics</b>                                  |                              |                      |              |                                      |              |
|                                                     | Nitrofurantoin               | *                    | *            | *                                    | *            |
| <b>Antidepressants</b>                              |                              |                      |              |                                      |              |
| Tricyclic/tetracycline antidepressants <sup>§</sup> | Amitriptyline                | *                    | *            |                                      | *            |
|                                                     | Amoxapine                    | *                    | *            |                                      |              |
|                                                     | Clomipramine                 | *                    | *            | *                                    | *            |
|                                                     | Desipramine                  | *                    |              |                                      |              |

(continued)

## APPENDIX 1 (continued)

| PIM criteria                               | Drugs                                 | 2003 Beers criteria | Laroche List | Lindblad classification <sup>†</sup> | PRISCUS list |
|--------------------------------------------|---------------------------------------|---------------------|--------------|--------------------------------------|--------------|
|                                            | Dosulepin                             |                     | *            |                                      |              |
|                                            | Doxepine                              | *                   | *            |                                      | *            |
|                                            | Imipramine                            | *                   | *            |                                      | *            |
|                                            | Maprotiline                           |                     | *            |                                      | *            |
|                                            | Nortriptyline                         | *                   |              |                                      |              |
|                                            | Protriptyline                         | *                   |              |                                      |              |
|                                            | Trimipramine                          | *                   |              |                                      |              |
| Norepinephrine-dopamine reuptake inhibitor | Bupropion                             | *                   | *            |                                      | *            |
| Selective serotonin reuptake inhibitor     | Fluoxetine                            |                     |              | *                                    |              |
|                                            | Paroxetine                            | *                   |              |                                      |              |
| Monoamine oxidase inhibitors               | Tranlycypromine                       |                     |              |                                      | *            |
| Antiepileptic drugs/ barbiturates**        |                                       |                     |              |                                      |              |
|                                            | Amobarbital                           | *                   |              |                                      |              |
|                                            | Butobarbital                          | *                   |              |                                      |              |
|                                            | Butalbital                            | *                   |              |                                      |              |
|                                            | Carbamazepine                         |                     |              | *                                    |              |
|                                            | Mephobarbital                         | *                   |              |                                      |              |
|                                            | Pentobarbital                         | *                   |              |                                      |              |
|                                            | Phenobarbital                         | *                   |              |                                      | *            |
|                                            | Phenytoin                             |                     |              | *                                    |              |
|                                            | Secobarbital                          | *                   |              |                                      |              |
| Antihistamines                             |                                       |                     |              |                                      |              |
|                                            | Alimemazine                           |                     | *            |                                      |              |
|                                            | Brompheniramine                       | *                   | *            |                                      |              |
|                                            | Buclizine                             |                     | *            |                                      |              |
|                                            | Carbinoxamine                         | *                   | *            |                                      |              |
|                                            | Chlorpheniramine                      | *                   | *            |                                      | *            |
|                                            | Clemastine                            | *                   |              |                                      | *            |
|                                            | Cyproheptadine                        | *                   | *            |                                      |              |
|                                            | Dexbrompheniramine                    | *                   |              |                                      |              |
|                                            | Dexchlorpheniramine                   | *                   | *            |                                      |              |
|                                            | Dexchlorpheniramine-<br>betamethasone |                     | *            |                                      |              |
|                                            | Dimenhydrinate                        | *                   | *            |                                      |              |
|                                            | Dimetindene                           |                     |              |                                      | *            |

(continued)

APPENDIX 1 (continued)

| PIM criteria                   | Drugs                          | 2003 Beers criteria | Laroche List | Lindblad classification <sup>†</sup> | PRISCUS list |
|--------------------------------|--------------------------------|---------------------|--------------|--------------------------------------|--------------|
|                                | Diphenhydramine                | *                   | *            |                                      |              |
|                                | Doxylamine                     | *                   | *            |                                      |              |
|                                | Hydroxyzine                    | *                   | *            |                                      | *            |
|                                | Loratadine                     | *                   |              |                                      |              |
|                                | Meclizine                      | *                   | *            |                                      |              |
|                                | Mequitazine                    |                     | *            |                                      |              |
|                                | Oxomemazine                    |                     | *            |                                      |              |
|                                | Pheniramine                    |                     | *            |                                      |              |
|                                | Pimethixene                    |                     | *            |                                      |              |
|                                | Promethazine                   | *                   | *            |                                      |              |
|                                | Triprolidine                   | *                   | *            |                                      | *            |
| <b>Antihypertensive drugs</b>  |                                |                     |              |                                      |              |
| Peripheral alpha-blockers      | Doxazosin                      | *                   |              | *                                    | *            |
|                                | Prazosin                       | *                   | *            | *                                    | *            |
|                                | Terazosin                      | *                   |              | *                                    | *            |
|                                | Urapidil                       |                     | *            |                                      |              |
| Central alpha-blockers         | Clonidine                      | *                   | *            |                                      | *            |
|                                | Guanabenz                      | *                   |              |                                      |              |
|                                | Guanfacine                     | *                   | *            |                                      |              |
|                                | Methyldopa                     | *                   | *            | *                                    | *            |
|                                | Moxonidine                     |                     | *            |                                      |              |
|                                | Reserpine                      | *>0.1 mg/d          | *            | *                                    | *            |
|                                | Rilmenidine                    |                     | *            |                                      |              |
| Calcium channel blockers       | Diltiazem                      |                     |              | *                                    |              |
|                                | Nicardipine                    |                     | *            |                                      |              |
|                                | Nifedipine (immediate release) | *                   | *            | *                                    | *            |
|                                | Verapamil                      |                     |              | *                                    |              |
| <b>Antiparkinsonian agents</b> |                                |                     |              |                                      |              |
|                                | Benztropine (oral)             | *                   |              |                                      |              |
|                                | Biperiden                      |                     | *            |                                      |              |
|                                | Piribedil                      |                     | *            |                                      |              |
|                                | Trihexyphenidyl                | *                   | *            |                                      |              |
|                                | Tropatepine                    |                     | *            |                                      |              |
| <b>Antiplatelet drugs</b>      |                                |                     |              |                                      |              |
|                                | Dipyridamole                   | *                   | *            |                                      |              |
|                                | Prasugrel                      |                     |              |                                      | *            |

(continued)

APPENDIX 1 (continued)

| PIM criteria                | Drugs                                                                  | 2003 Beers criteria | Laroche List | Lindblad classification <sup>†</sup> | PRISCUS list |
|-----------------------------|------------------------------------------------------------------------|---------------------|--------------|--------------------------------------|--------------|
|                             | Ticlopidine                                                            |                     | *            |                                      | *            |
|                             | Aspirin                                                                | *>325 mg/d          |              |                                      |              |
| Antipsychotics              |                                                                        |                     |              |                                      |              |
| Typical antipsychotics      | Chlorpromazine                                                         | *                   | *            | *                                    |              |
|                             | Cyamemazine                                                            |                     | *            |                                      |              |
|                             | Fluphenazine                                                           |                     | *            |                                      | *            |
|                             | Haloperidol                                                            |                     |              | *                                    | *>2 mg       |
|                             | Levomepromazine                                                        |                     | *            |                                      | *            |
|                             | Perphenazine                                                           |                     | *            |                                      | *            |
|                             | Pipotiazine                                                            |                     | *            |                                      |              |
|                             | Prochlorperazine                                                       | *                   |              |                                      |              |
|                             | Propericiazine                                                         |                     | *            |                                      |              |
|                             | Thioridazine                                                           | *                   |              | *                                    | *            |
|                             | Thiothixene                                                            | *                   |              | *                                    |              |
| Atypical antipsychotics     | Clozapine                                                              | *                   |              | *                                    | *            |
|                             | Olanzapine                                                             | *                   |              |                                      | *>10 mg      |
| Antispasmodics              |                                                                        |                     |              |                                      |              |
|                             | Atropine (exclude ophthalmic)                                          | *                   | *            |                                      |              |
|                             | Clidinium-chlordiazepoxide                                             | *                   | *            |                                      |              |
|                             | Dicyclomine                                                            | *                   |              |                                      |              |
|                             | Dihexyverine                                                           |                     | *            |                                      |              |
|                             | Diphenoxylate-atropine                                                 |                     | *            |                                      |              |
|                             | Hyoscyamine                                                            | *                   | *            |                                      |              |
|                             | Propantheline                                                          | *                   |              |                                      |              |
|                             | Scopolamine                                                            | *                   | *            |                                      |              |
|                             | Tiemonium                                                              |                     | *            |                                      |              |
| Urinary antispasmodics      | Oxybutynine (non-sustained-release and sustained-release formulations) |                     | *            |                                      | *            |
|                             | Solifenacin                                                            |                     | *            |                                      | *            |
|                             | Tolterodine                                                            |                     | *            |                                      | *            |
| Benzodiazepines             |                                                                        |                     |              |                                      |              |
| Long-acting benzodiazepines | Aceprometazine                                                         |                     | *            |                                      |              |
|                             | Bromazepam                                                             |                     | *            |                                      | *            |

(continued)

APPENDIX 1 (continued)

| PIM criteria                                       | Drugs                        | 2003 Beers criteria | Laroche List | Lindblad classification <sup>†</sup> | PRISCUS list |
|----------------------------------------------------|------------------------------|---------------------|--------------|--------------------------------------|--------------|
|                                                    | Chlorazepate                 | *                   | *            |                                      |              |
|                                                    | Chlordiazepoxide             | *                   | *            |                                      | *            |
|                                                    | Clobazam                     |                     | *            |                                      | *            |
|                                                    | Clonazepam                   | *                   |              |                                      |              |
|                                                    | Clorazepate-<br>acepromazine |                     | *            |                                      |              |
|                                                    | Diazepam                     | *                   | *            |                                      | *            |
|                                                    | Dipotassium<br>clorazepate   |                     |              |                                      | *            |
|                                                    | Estazolam                    |                     | *            |                                      |              |
|                                                    | Flunitrazepam                |                     | *            |                                      | *            |
|                                                    | Flurazepam                   | *                   |              |                                      | *            |
|                                                    | Loflazepate                  |                     | *            |                                      |              |
|                                                    | Medazepam                    |                     |              |                                      | *            |
|                                                    | Nitrazepam                   |                     | *            |                                      | *            |
|                                                    | Nordazepam                   |                     | *            |                                      |              |
|                                                    | Prazepam                     |                     | *            |                                      | *            |
|                                                    | Quazepam                     | *                   |              |                                      |              |
| Short- and intermediate-<br>acting benzodiazepines | Alprazolam                   | *                   | *>2 mg/d     |                                      | *            |
|                                                    | Brotizolam                   |                     |              |                                      | *0.125 mg/d  |
|                                                    | Clotiazepam                  |                     | *>5 mg/d     |                                      |              |
|                                                    | Estazolam                    | *                   |              |                                      |              |
|                                                    | Loprazolam                   |                     | *>0.5 mg/d   |                                      |              |
|                                                    | Lorazepam                    | *                   | *>3 mg/d     |                                      | *>2 mg/d     |
|                                                    | Lormetazepam                 |                     | *>0.5 mg/d   |                                      | *>0.5 mg/d   |
|                                                    | Oxazepam                     | *                   | *>60 mg/d    |                                      | *>60 mg/d    |
|                                                    | Temazepam                    | *                   | *>15 mg/d    |                                      | *            |
|                                                    | Triazolam                    | *                   | *>0.25 mg/d  |                                      | *            |
| Benzodiazepine receptor<br>analogues               | Eszopiclone                  | *                   |              |                                      |              |
|                                                    | Zaleplone                    | *                   |              |                                      | *>5 mg/d     |
|                                                    | Zolpidem                     | *                   | *>5 mg/d     |                                      | *>5 mg/d     |
|                                                    | Zopiclone                    |                     | *>3.75 mg/d  |                                      | *>3.75 mg/d  |
| Cerebral/peripheral vasodilators                   | Dihydroergocryptine          |                     | *            |                                      | *            |

(continued)

APPENDIX 1 (continued)

| PIM criteria                         | Drugs                         | 2003 Beers criteria | Laroche List | Lindblad classification <sup>†</sup> | PRISCUS list |
|--------------------------------------|-------------------------------|---------------------|--------------|--------------------------------------|--------------|
|                                      | Dihydroergotoxin              |                     | *            |                                      | *            |
|                                      | Dihydroergocristine           |                     | *            |                                      |              |
|                                      | Moxisylyte                    |                     | *            |                                      |              |
|                                      | Naftidrofuryl                 |                     | *            |                                      | *            |
|                                      | Nicergoline                   |                     | *            |                                      | *            |
|                                      | Pentoxifylline                |                     | *            |                                      | *            |
|                                      | Raubasine-dihydroergocristine |                     | *            |                                      |              |
|                                      | Troxerutin-vincamine          |                     | *            |                                      |              |
|                                      | Vinburnine                    |                     | *            |                                      |              |
|                                      | Vincamine                     |                     | *            |                                      |              |
|                                      | Vincamine-rutoside            |                     | *            |                                      |              |
| <b>Endocrine</b>                     |                               |                     |              |                                      |              |
| Hormones                             | Methyltestosterone            | *                   |              |                                      |              |
|                                      | Testosterone                  | *                   |              |                                      |              |
|                                      | Desiccated thyroid            | *                   |              |                                      |              |
|                                      | Estrogens                     | *                   |              |                                      |              |
|                                      | Megestrol                     | *                   |              |                                      |              |
| Long-acting sulfonylureas            | Carbutamide                   |                     | *            |                                      |              |
|                                      | Chlorpropamide                | *                   |              |                                      |              |
|                                      | Glipizide                     |                     | *            |                                      |              |
|                                      | Glyburide                     | *                   |              |                                      |              |
| Thiazolidinediones                   | Cilostazol                    | *                   |              |                                      |              |
|                                      | Pioglitazone                  | *                   |              |                                      |              |
| Antiemetic drugs                     | Rosiglitazone                 | *                   |              |                                      |              |
| <b>Gastrointestinal drugs</b>        |                               |                     |              |                                      |              |
| H <sub>2</sub> -receptor antagonists | Cimetidine                    | *                   | *            |                                      |              |
| Antiemetic drugs                     | Alizapride                    |                     | *            |                                      |              |
|                                      | Metoclopramide                | *                   |              | *                                    |              |
|                                      | Metopimazine                  |                     | *            |                                      |              |
| Proton-pump inhibitors               |                               | *                   |              |                                      |              |
| <b>Genitourinary</b>                 |                               |                     |              |                                      |              |
|                                      | Desmopressin                  | *                   |              |                                      |              |
| <b>Laxatives</b>                     |                               |                     |              |                                      |              |
|                                      | Bisacodyl                     | *                   | *            |                                      |              |
|                                      | Docusate                      |                     | *            |                                      |              |
|                                      | Sennosides                    |                     | *            |                                      |              |

(continued)

APPENDIX 1 (continued)

| PIM criteria                          | Drugs              | 2003 Beers criteria | Laroche List | Lindblad classification <sup>†</sup> | PRISCUS list |
|---------------------------------------|--------------------|---------------------|--------------|--------------------------------------|--------------|
|                                       | Sodium picosulfate |                     | *            |                                      |              |
| Muscle relaxants                      |                    |                     |              |                                      |              |
|                                       | Baclofen           |                     | *            |                                      | *            |
|                                       | Carisoprodol       | *                   |              |                                      |              |
|                                       | Chlorzoxazone      | *                   |              |                                      |              |
|                                       | Cyclobenzaprine    | *                   |              |                                      |              |
|                                       | Metaxalone         | *                   |              |                                      |              |
|                                       | Methocarbamol      | *                   | *            |                                      |              |
|                                       | Orphenadrine       | *                   |              |                                      |              |
|                                       | Tetrazepam         |                     | *            |                                      | *            |
| Oral decongestants ***                |                    |                     |              |                                      |              |
|                                       | Phenylephrine      | *                   |              |                                      |              |
|                                       | Pseudoephedrine    | *                   |              | *                                    |              |
| Central nervous system stimulants     |                    |                     |              |                                      |              |
|                                       | Amphetamine        | *                   |              |                                      |              |
|                                       | Methylphenidate    | *                   |              | *                                    |              |
|                                       | Theophylline       | *                   |              |                                      |              |
| Miscellaneous/natural health products |                    |                     |              |                                      |              |
|                                       | Aloe               |                     | *            |                                      |              |
|                                       | Castor oil         |                     | *            |                                      |              |
|                                       | Cascara            |                     | *            |                                      |              |
|                                       | Ergotamine         |                     |              |                                      | *            |
|                                       | Ginkgo biloba      |                     | *            |                                      |              |
|                                       | Mineral oil        | *                   |              |                                      |              |
|                                       | Piracetam          |                     | *            |                                      | *            |
|                                       | Viscous paraffin   |                     |              |                                      | *            |

Appendix to: Patel T, Slonim K, Lee L. Use of potentially inappropriate medications among ambulatory home-dwelling elderly patients with dementia: a review of the literature. *Can Pharm J (Ott)* 2017;150(3). DOI: 10.1177/17151635177011770.

<sup>†</sup>Lindblad classification included a list of clinically relevant drug-disease interactions.

<sup>‡</sup>All NSAIDs were considered inappropriate in the Beers Criteria for patients with certain conditions.

<sup>§</sup>All tricyclic antidepressants were considered inappropriate in Beers Criteria for patients with certain conditions.

\*\*All barbiturates are considered inappropriate in the Beers Criteria for patients with certain conditions.

\*\*\*All decongestants were considered inappropriate in Beers Criteria for patients with certain conditions.
